# Supplementary material for: In vivo methylation of mtDNA reveals the dynamics of protein–mtDNA interactions
Source: PubMed Central journal article supplement — Nucleic Acids Res. 2009 Sep 9;37(20):6701–15. doi: 10.1093/nar/gkp727 (PMC2777446; doi:10.1093/nar/gkp727), 2009-09-09
Supplement: gkp727_2.pdf [file gkp727_2.pdf]

A

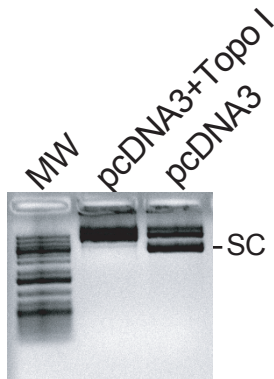

B

|          |   |   |   |   |   |   |   |   |
|----------|---|---|---|---|---|---|---|---|
| Topo     | - | + | - | + | - | + | - | + |
| M.CviPI  | + | + | - | - | + | + | - | - |
| R.HaeIII | + | + | + | + | - | - | - | - |
| R.Apal   | - | - | - | - | + | + | + | + |

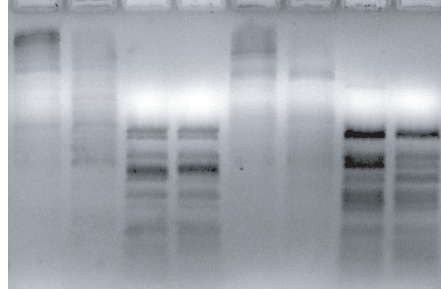

C

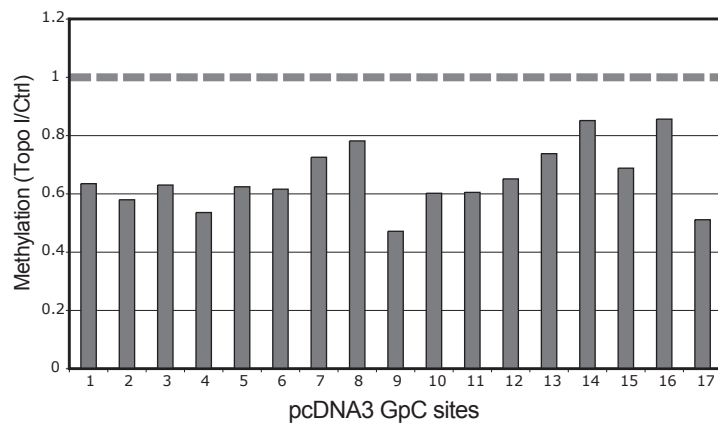

**Figure Sup2. M.CviPI preferentially methylates topologically relaxed plasmid DNA.**

A: pcDNA3 plasmid treated with topoisomerase I showed different gel migration. B: Topoisomerase treated DNA was subjected to in vitro methylation followed by digestion with methylase-sensitive restriction endonucleases (HaeIII and Apal). C: Comparison of the methylation levels between control and topoisomerase I-treated cells. Methylation was determined by bisulfate treatment/sequencing in topoisomerase-treated and control plasmids.
