# Supplementary material for: In vivo methylation of mtDNA reveals the dynamics of protein–mtDNA interactions
Source: PubMed Central journal article supplement — Nucleic Acids Res. 2009 Sep 9;37(20):6701–15. doi: 10.1093/nar/gkp727 (PMC2777446; doi:10.1093/nar/gkp727), 2009-09-09
Supplement: gkp727_3.pdf [file gkp727_3.pdf]

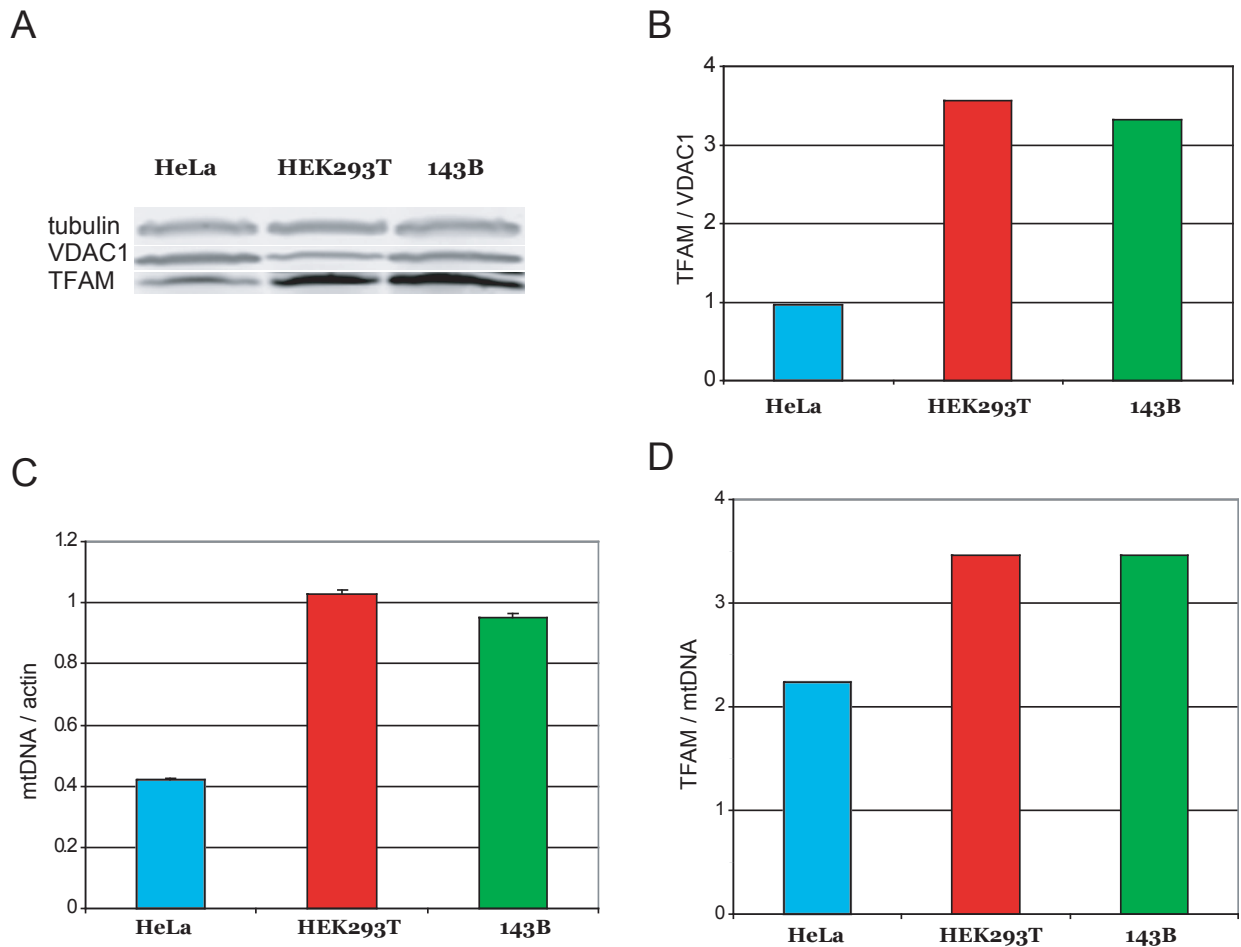

**Figure Sup3. Levels of TFAM and mtDNA in different cell lines.** A: Western blot showing the steady-state levels of tubulin, VDAC1 and TFAM in HeLa, HEK293T and 143B. B: Odyssey fluorescent quantification of the western blots was used to determine the relative levels of TFAM/VDAC1. C: mtDNA/actin relative levels in the three different cell lines were determined by qPCR. D: TFAM/VDAC1 levels were expressed as a ratio to mtDNA/actin.
