# Supplementary material for: In vivo methylation of mtDNA reveals the dynamics of protein–mtDNA interactions
Source: PubMed Central journal article supplement — Nucleic Acids Res. 2009 Sep 9;37(20):6701–15. doi: 10.1093/nar/gkp727 (PMC2777446; doi:10.1093/nar/gkp727), 2009-09-09
Supplement: gkp727_4.pdf [file gkp727_4.pdf]

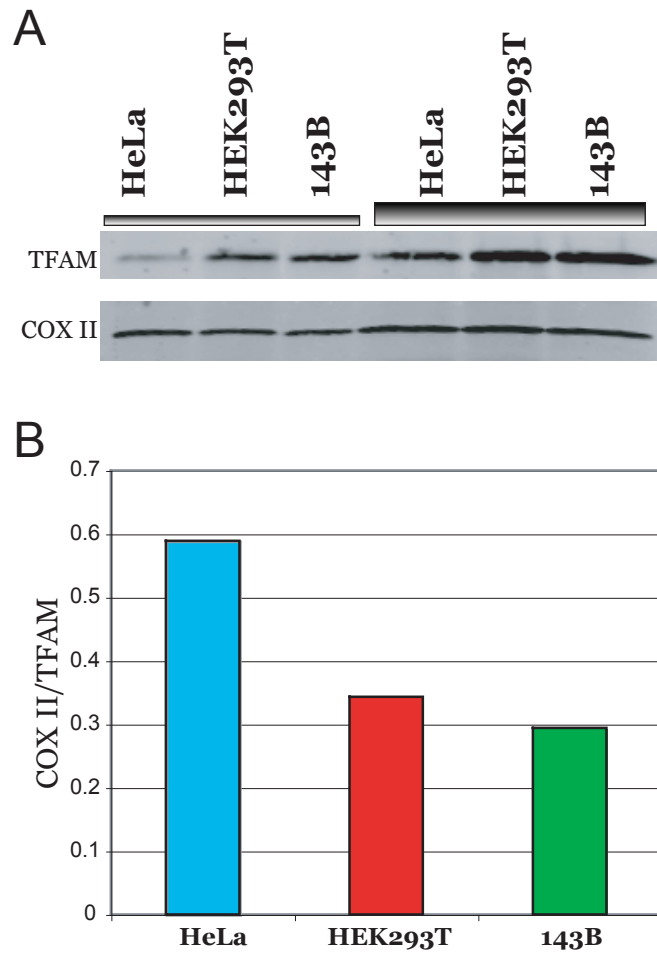

**Figure Sup4. Levels of TFAM and COX II in different cell lines.** A: Western blot showing the steady-state levels of TFAM and COX II in HeLa, HEK293T and 143B. In the first three lanes 20 µg of protein were used whereas in the last three lanes 50 µg of proteins were used. B: Odyssey fluorescent quantification of the western blots was used to determine the relative levels of TFAM/COX II.
